# Supplementary material for: Oriented basement membrane fibrils provide a memory for F-actin planar polarization via the Dystrophin-Dystroglycan complex during tissue elongation
Source: Oxford University Press journal article supplement (doi:10.1242/dev.186957), 2020-03-10
Supplement: dev186957supp.pdf [file dev186957supp.pdf]

## Supplemental data

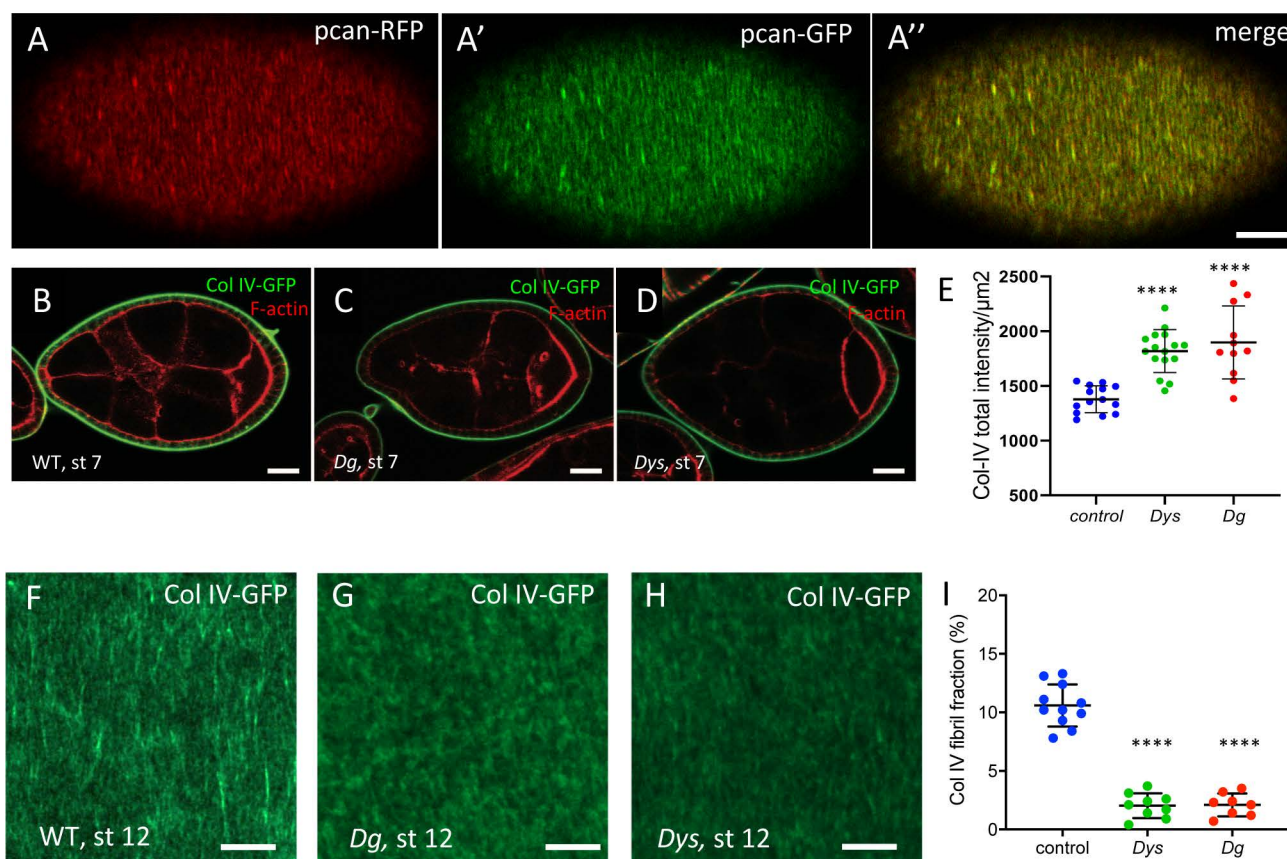

### Figure S1

A) Basal view of the ECM of stage 7 from fly trans-heterozygous flies for *Pcan-RFP* and *Pcan-GFP*

B-D) Optical cross-section of stage 7 WT, *Dys*<sup>E17/Exel6184</sup> and *Dg*<sup>O46/O83</sup> mutant follicles that express ColIV-GFP and stained for F-actin.

E) Quantification of the total fluorescence intensity per area unit in stage 8 WT, *Dys*<sup>E17/Exel6184</sup> and *Dg*<sup>O46/O83</sup> null mutant follicles.

F-H) Basal view of the ECM of stage 12 WT, *Dys*<sup>E17/Exel6184</sup> and *Dg*<sup>O46/O83</sup> null mutant follicles that express ColIV-GFP.

I) Quantification of the BM fibril fraction in stage 12 WT, *Dys*<sup>E17/Exel6184</sup> and *Dg*<sup>O46/O83</sup> null mutant follicles. Scalebar 10µm.

For all panels error bars represent s.d.; p \* < 0.01, \*\* < 0.005, \*\*\* < 0.001, \*\*\*\* < 0.0001.

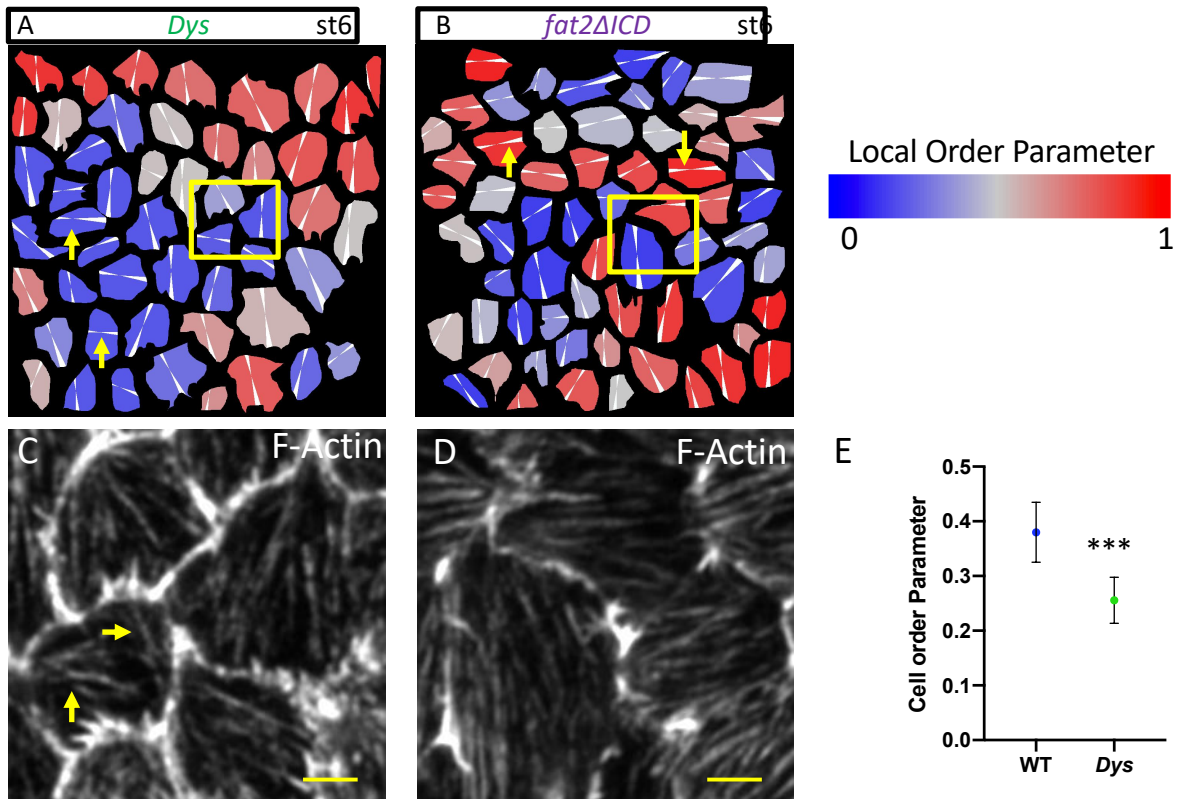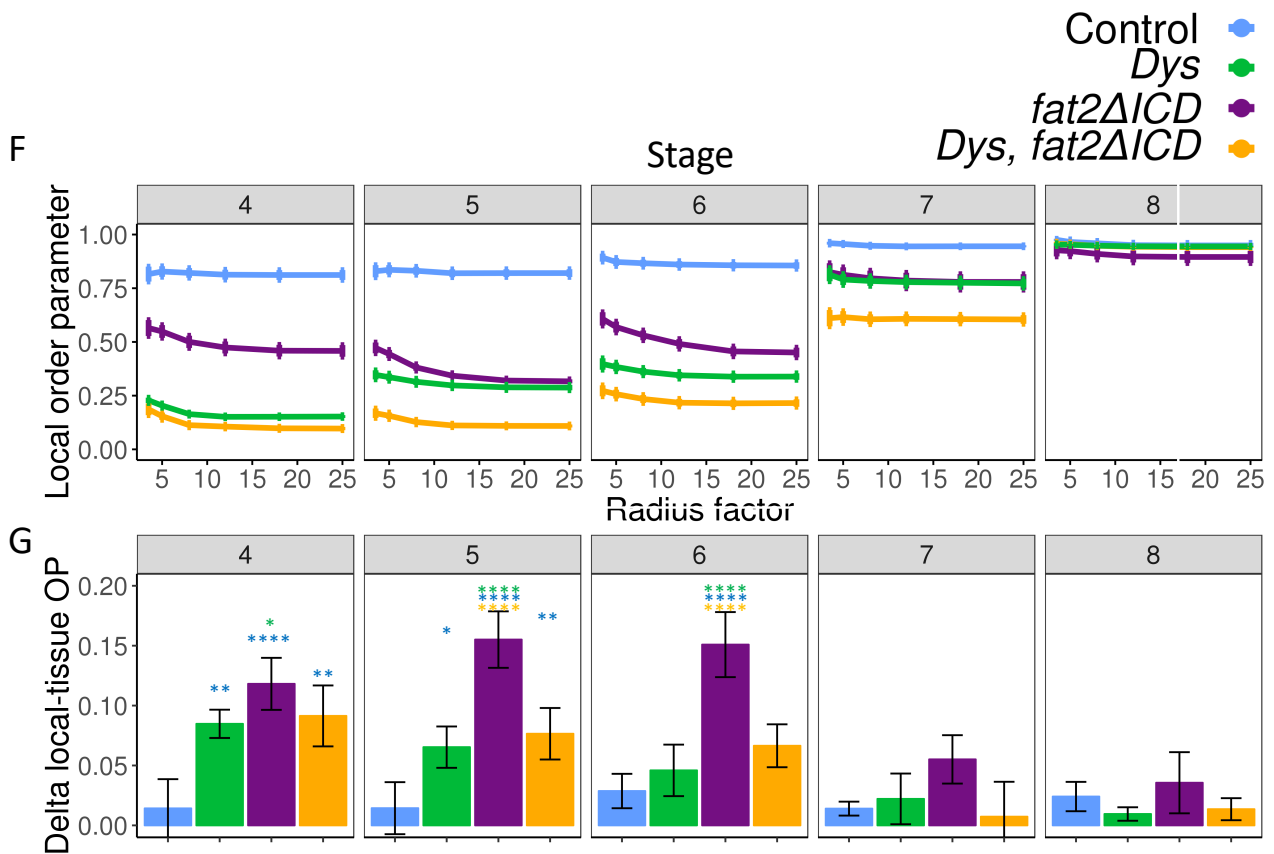

**Figure S2:**

A-B) Color coding of the Local OP by cell on representative images (B and C of Fig. 4) of A) *Dys*<sup>E17/Exel6184</sup> and B) *fat2deltaICD* mutants. Main orientation of the stress fibers is indicated in white. Note that cells with a wrong orientation (yellow arrows) can have a high Local OP in *fat2deltaICD* mutant (but not in *Dys* mutant) indicating that they are surrounded by cells with a similar orientation. C-D) Zoom-in corresponding to the yellow squares in A and B. Yellow arrows highlight divergent stress fibers in a same cell in *Dys* mutant.

E) Cell Order Parameter for *Dys* mutant cells and WT neighboring cells at stage 5 (n >138 cells).

F) Representation for stages 4 to 8 of the Local OP as a function of the distance (measured in cell radius), showing the tendency from Local OP to Tissue OP. G) Difference between Local OP (minimal value for radius in E) and Tissue OP (maximal value for radius in E) (n > 171 cells for each stage and each genotype).

For all panels error bars represent s.d.; p \* < 0.01, \*\* < 0.005, \*\*\* < 0.001, \*\*\*\* < 0.0001. Scale bar 2µm

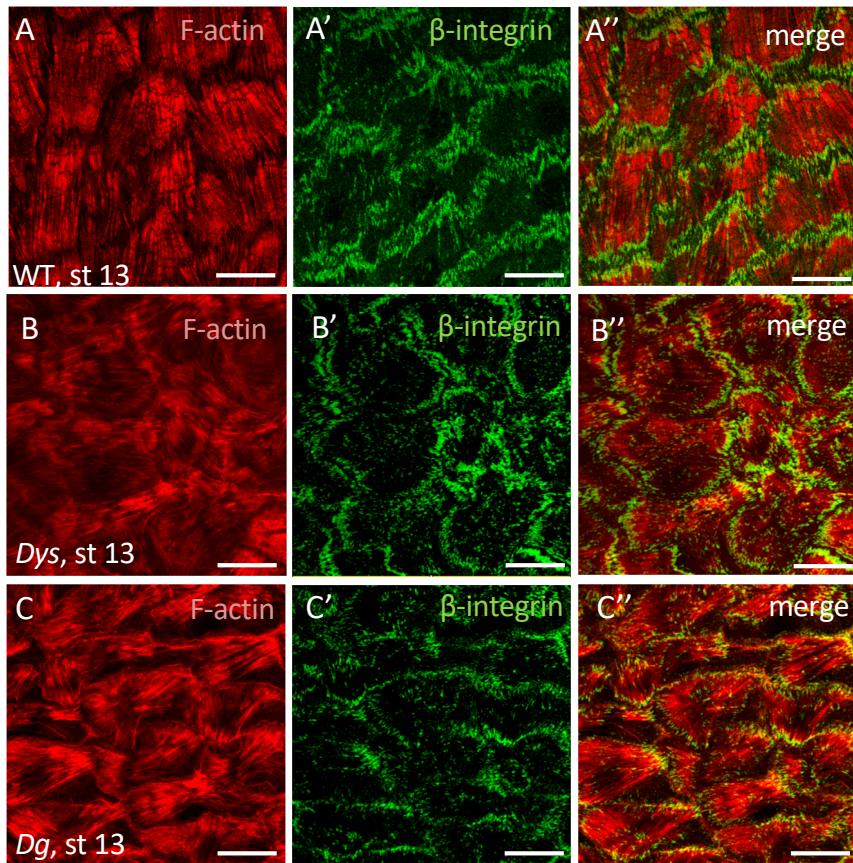

**Figure S3:**

F-actin and Beta-integrin staining in A) WT, B) *Dys*<sup>E17/Exel6184</sup> and C) *Dg*<sup>O46/O83</sup> mutant follicles at stage 13.

Scale bar 10 $\mu$ m



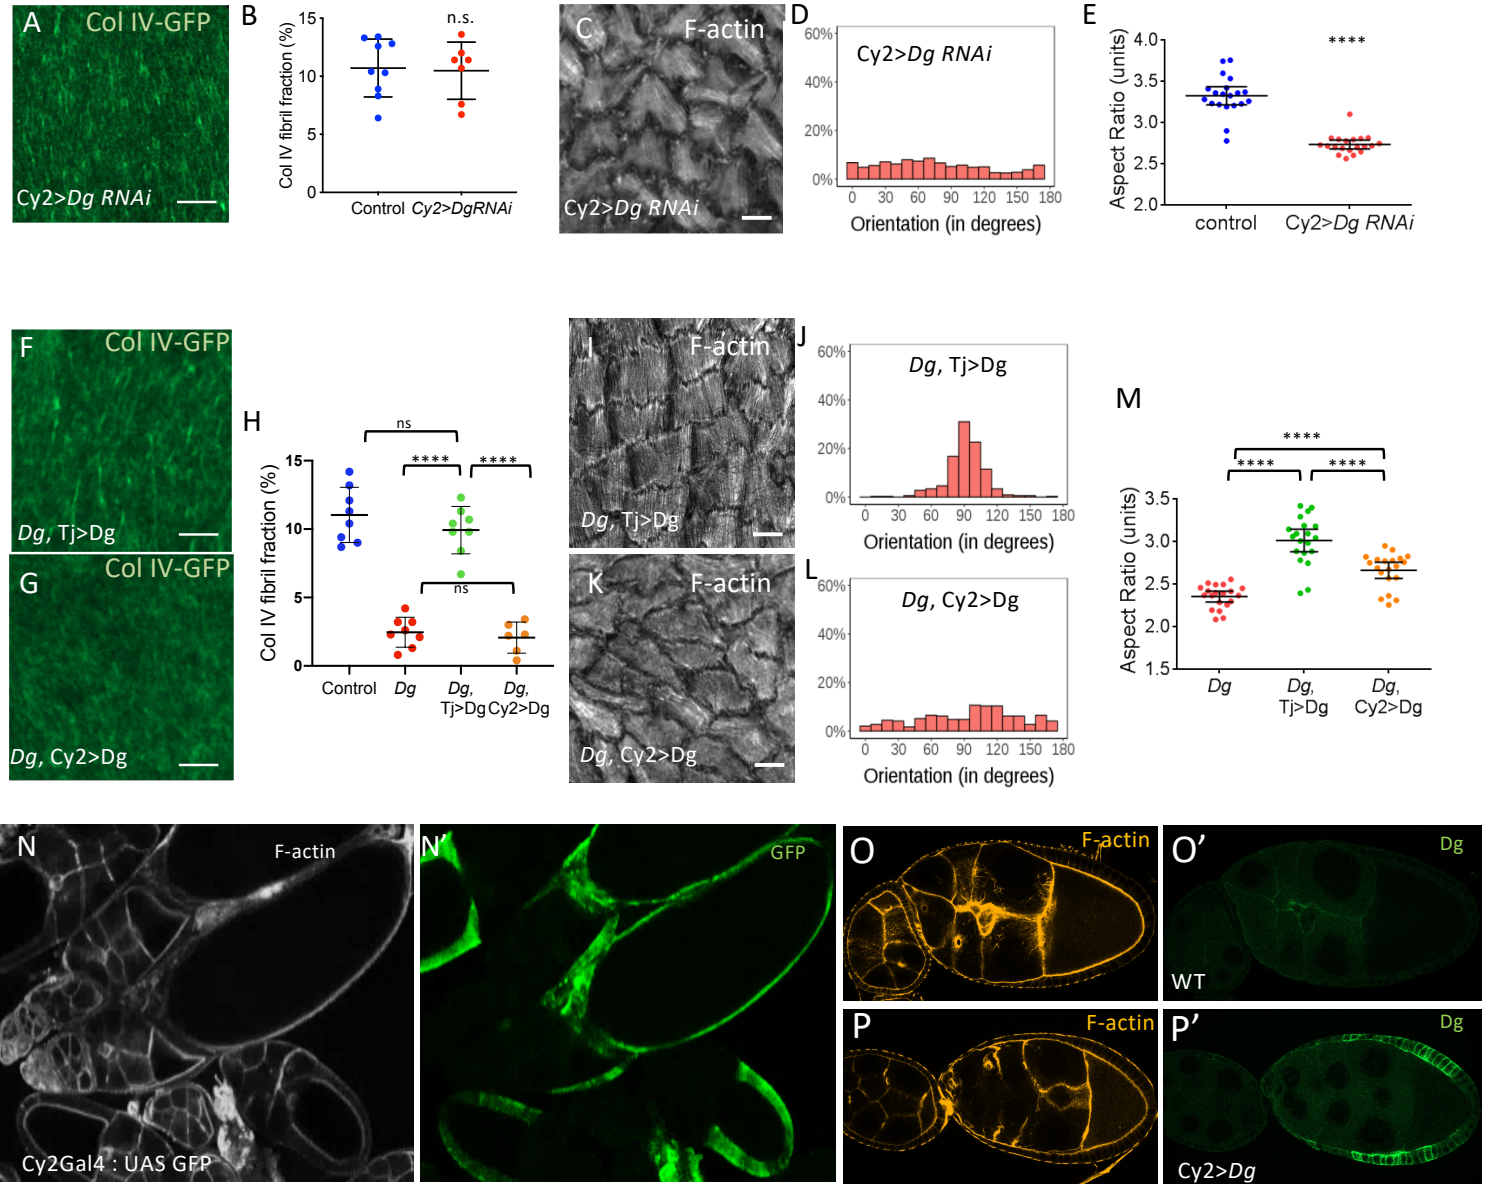

**Figure S4:**

A,F,G) Basal view of the ECM at stage 12 of A) Dg RNAi driven with Cy2:Gal4, F) *Dg*<sup>O46/O83</sup> mutant expressing UAS:Dg driven with tj:Gal4, G) Dg mutant expressing UAS:Dg driven with Cy2:Gal4

B,H) Quantification of the BM fibril fraction for the indicated genotypes at stages 12.

C,I,K) Representative images of basal F-actin at stage 13 of C) Dg RNAi driven with Cy2:Gal4, I) Dg mutant expressing UAS:Dg RNAi driven with tj:gal4, K) *Dg* mutant expressing UAS:Dg RNAi driven with Cy2:Gal4

D,J, L) Quantification of stress fiber angular distribution of the same genotypes than in C,J,K).

E, M) Aspect-Ratio quantification of mature eggs of the indicated genotypes.

N) Expression profile of Cy2:Gal4. GFP can be detected from stage 9.

O-P) Dg immunostaining in WT and Cy2:Gal4 UAS:Dg flies. Endogenous Dg is not detected but induced expression is clearly detectable at stage 9.

(For all panels error bars represent s.d.; p \* < 0.01, \*\* < 0.005, \*\*\* < 0.001, \*\*\*\* < 0.0001) Scale bar 10 μm.

30°C

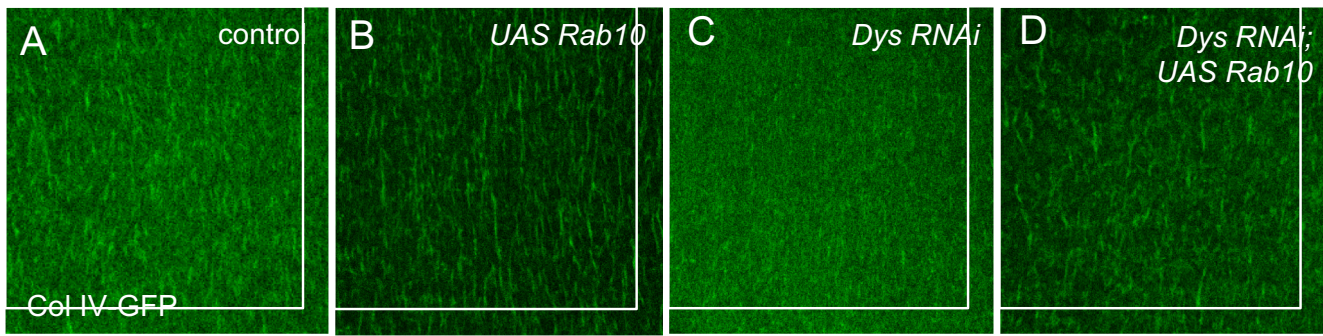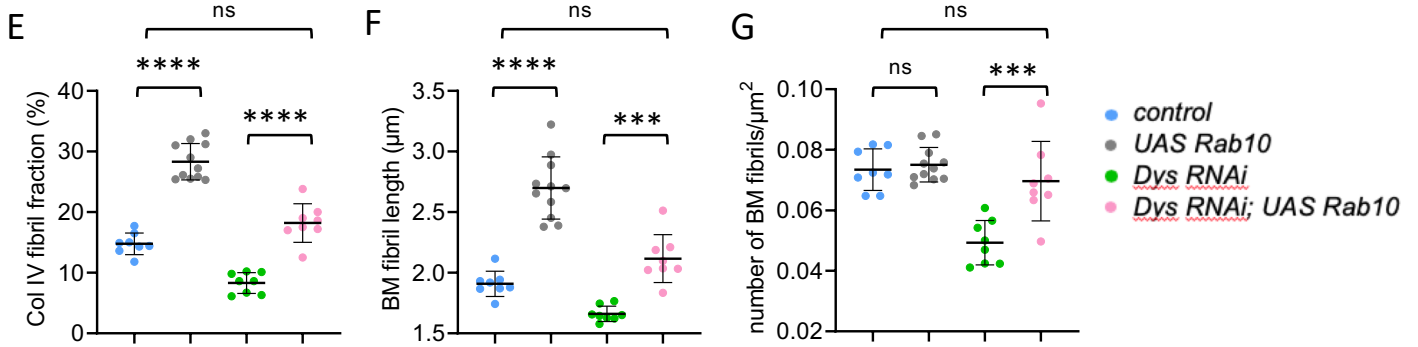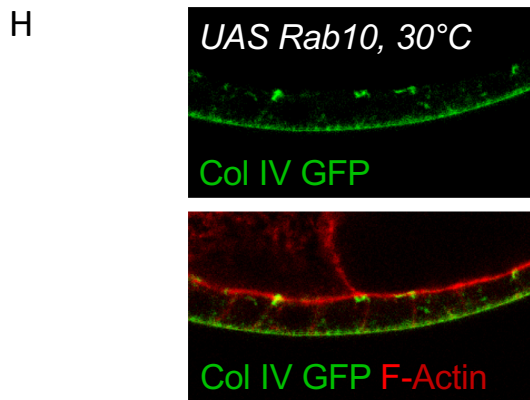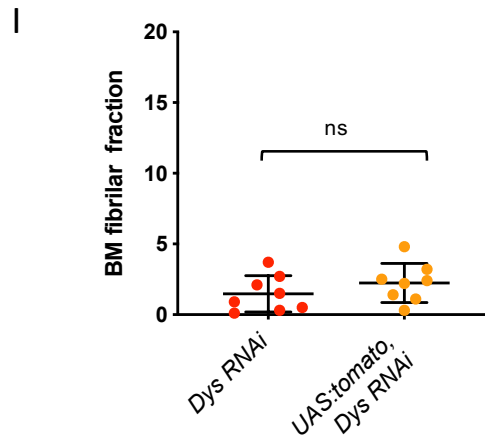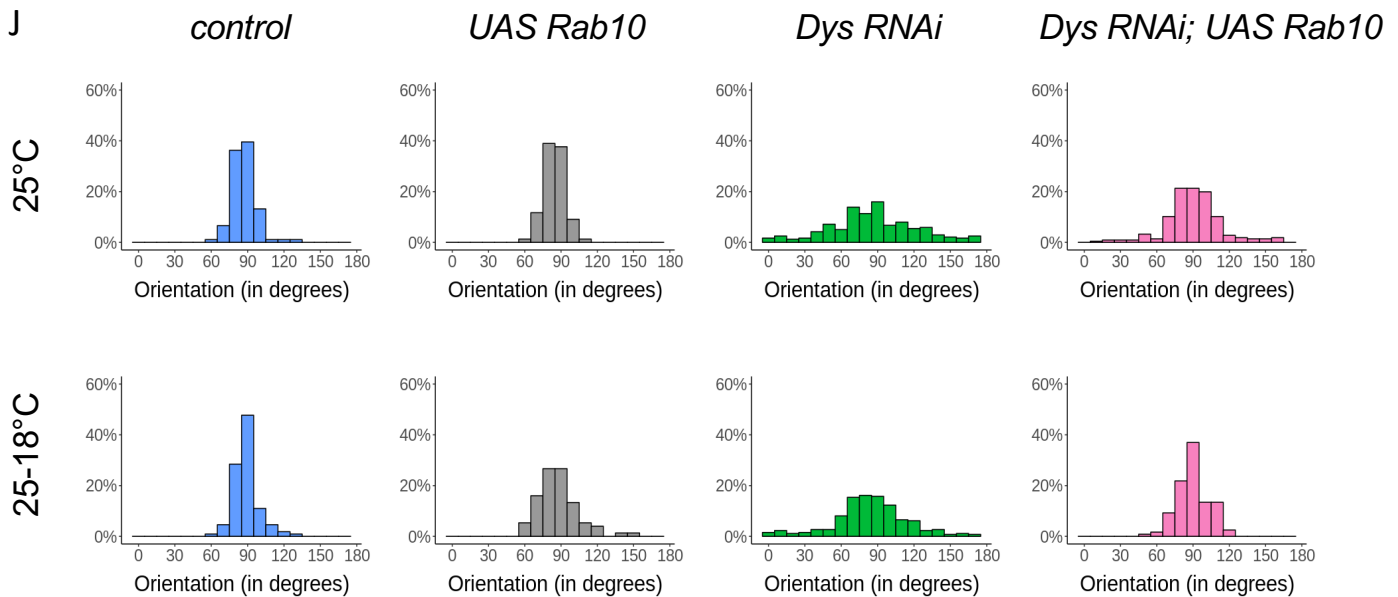

**Figure S5:**

A-D) Basal view of the ECM at stage 8 of A) WT, B) *tj:Gal4>UAS:Rab10*, C) *tj:Gal4>UAS Dys RNAi*, D) *tj:Gal4> UAS Dys RNAi, UAS Rab10*.

E-G) Quantification of E) BM fibril fraction F) fibril length and G) fibril numbers per  $\mu\text{m}^2$  at stage 8 for the indicated genotypes at 30°C (n>8). (error bars represent s.d.; p \*< 0.01, \*\*<0.005, \*\*\*<0.001, \*\*\*\*<0.0001)

H) Section view of the follicular epithelium expressing ColIV-GFP and overexpressing Rab10 at 30°C.

I) Quantification of fibril fraction at stage 12 for *tj>Dys RNAi* and *tj>UAS:tomato; Dys RNAi*

J) Angular distribution for the indicated genotypes without (25°C) or with (25-18°C) a switch to non-permissive temperature.

**Table S1: Genotypes and specific conditions**

| Figure           | Genotype                                                                                             | Conditions                                                                                                                                                                                                                                                                                                                                                                                                                                                                                                                                                                                                 |                                                                                                  |
|------------------|------------------------------------------------------------------------------------------------------|------------------------------------------------------------------------------------------------------------------------------------------------------------------------------------------------------------------------------------------------------------------------------------------------------------------------------------------------------------------------------------------------------------------------------------------------------------------------------------------------------------------------------------------------------------------------------------------------------------|--------------------------------------------------------------------------------------------------|
| <b>Figure 1</b>  | B, E, F, G, H, I, L<br>C, E, F, G, H, J, L<br>D, E, F, G, H, K, L<br>E, F, G                         | WT ( <i>w<sup>1118</sup></i> )<br><i>Dys<sup>E17</sup>/Dys<sup>Exel6184</sup></i><br><i>Dg<sup>O43</sup>/Dg<sup>O86</sup></i><br><i>Dg<sup>O43</sup>/Dg<sup>O86</sup>; Dys<sup>E17</sup>/Dys<sup>Exel6184</sup></i>                                                                                                                                                                                                                                                                                                                                                                                        | 25°C                                                                                             |
| <b>Figure 2</b>  | A<br>B<br>C<br>D<br>E<br>F, G, H<br>I, J<br>K<br>L                                                   | Trol-RFP/+ ; CollIV-GFP/+<br>Trol-RFP/+ ; ; LanA-GFP/+<br>Trol-RFP/+ ; ; <i>Dys<sup>E17</sup>/Dys<sup>Exel6184</sup></i><br>CollIV-GFP/+ ; <i>Dys<sup>E17</sup>/Dys<sup>Exel6184</sup></i><br><i>Dys<sup>E17</sup>/LanA-GFP, Dys<sup>Exel6184</sup></i><br>WT<br><i>Dys<sup>E17</sup>/Dys<sup>Exel6184</sup></i><br><i>Dg<sup>O43</sup>/Dg<sup>O86</sup></i><br><i>y, w, HS:flp122/+ ; ; FRT82B, Ubi:RFP<sup>nls</sup>/FRT82B, Dys<sup>Exel6184</sup></i><br><i>fat2<sup>N103-2</sup>/fat2<sup>58D</sup></i><br><i>fat2<sup>N103-2</sup>, Dys<sup>E17</sup>/fat2<sup>58D</sup>, Dys<sup>Exel6184</sup></i> | 25°C<br>25°C<br>25°C<br>25°C<br>25°C<br>25°C, 2HS 1H, dissection 5 days after HS<br>25°C<br>25°C |
| <b>FigureS1</b>  | A<br>B, E, F, I<br>C, G, E, I<br>D, H, E, I                                                          | Pcan-RFP / Pcan-GFP<br>CollIV-GFP/+<br>CollIV-GFP, <i>Dg<sup>O86</sup>/Dg<sup>O43</sup></i><br>CollIV-GFP/+ ; <i>Dys<sup>E17</sup>/Dys<sup>Exel6184</sup></i>                                                                                                                                                                                                                                                                                                                                                                                                                                              | 25°C                                                                                             |
| <b>Figure 3</b>  | A-F, T<br>G-L, T<br>M-R, T<br>U, V                                                                   | WT<br><i>Dys<sup>E17</sup>/Dys<sup>Exel6184</sup></i><br><i>Dg<sup>O43</sup>/Dg<sup>O86</sup></i><br><i>y, w, HS:flp122/+ ; ; FRT82B, Ubi:RFP<sup>nls</sup> / FRT82B, Dys<sup>Exel6184</sup></i>                                                                                                                                                                                                                                                                                                                                                                                                           | 25°C<br>25°C, 2HS 1H, dissection 5 days after HS                                                 |
| <b>Figure 4</b>  | A, I, J, K, L, M, Q, R<br>B, I, J, K, L, N, Q, R<br>C, I, J, K, L, O, Q, R<br>D, I, J, K, L, P, Q, R | WT<br><i>Dys<sup>E17</sup>/Dys<sup>Exel6184</sup></i><br><i>fat2<sup>N103-2</sup>/fat2DeltaICD-3xGFP</i><br><i>fat2<sup>N103-2</sup>, Dys<sup>E17</sup>/fat2DeltaICD-3xGFP, Dys<sup>Exel6184</sup></i>                                                                                                                                                                                                                                                                                                                                                                                                     | 25°C                                                                                             |
| <b>Figure S2</b> | F, G<br>A, C, F, G<br>E<br>B, D, F, G<br>F, G                                                        | WT<br><i>Dys<sup>E17</sup>/Dys<sup>Exel6184</sup></i><br><i>y, w, HS:flp122/+ ; ; FRT82B, Ubi:RFP<sup>nls</sup> / FRT82B, Dys<sup>Exel6184</sup></i><br><i>fat2<sup>N103-2</sup>/fat2DeltaICD-3xGFP</i><br><i>fat2<sup>N103-2</sup>, Dys<sup>E17</sup>/fat2DeltaICD-3xGFP, Dys<sup>Exel6184</sup></i>                                                                                                                                                                                                                                                                                                      | 25°C                                                                                             |
| <b>Figure 5</b>  | A-D<br>E-H<br>I-L<br>M, N                                                                            | WT<br><i>Dys<sup>E17</sup>/Dys<sup>Exel6184</sup></i><br><i>Dg<sup>O86</sup>/Dg<sup>O43</sup></i><br><i>y, w, HS:flp122/+; FRTG13, Ubi:GFP<sup>nls</sup>/FRTG13, Dg</i>                                                                                                                                                                                                                                                                                                                                                                                                                                    | 25°C                                                                                             |
| <b>Figure S3</b> | A<br>B<br>C                                                                                          | WT<br><i>Dys<sup>E17</sup>/Dys<sup>Exel6184</sup></i><br><i>Dg<sup>O86</sup>/Dg<sup>O43</sup></i>                                                                                                                                                                                                                                                                                                                                                                                                                                                                                                          | 25°C                                                                                             |
| <b>Figure 6</b>  | B-E<br>F-I                                                                                           | Tj:Gal4, CollIV-GFP; tub:Gal80 <sup>ts</sup> /+<br>Tj:Gal4, CollIV-GFP / UAS: Dg-RNAi ; tub:Gal80 <sup>ts</sup> /+<br>Tj:Gal4, CollIV-GFP; tub:Gal80 <sup>ts</sup> /+<br>Tj:Gal4, CollIV-GFP / UAS: Dg-RNAi ; tub:Gal80 <sup>ts</sup> /+                                                                                                                                                                                                                                                                                                                                                                   | 18°C<br>30°C                                                                                     |



|                  |           |                                                                                                                                                                                                                          |                                                 |
|------------------|-----------|--------------------------------------------------------------------------------------------------------------------------------------------------------------------------------------------------------------------------|-------------------------------------------------|
|                  | L-O       | Tj:Gal4, CollIV-GFP; tub:Gal80 <sup>ts</sup> /+                                                                                                                                                                          | 18°C switch at 30°C during 30 hours             |
|                  | P-S       | Tj:Gal4, CollIV-GFP / UAS: Dg-RNAi ; tub:Gal80 <sup>ts</sup> /+<br>Tj:Gal4, CollIV-GFP; tub:Gal80 <sup>ts</sup> /+<br>Tj:Gal4, CollIV-GFP / UAS: Dg-RNAi ; tub:Gal80 <sup>ts</sup> /+                                    | 30°C switch at 18°C during 72 hours             |
| <b>Figure S4</b> | A-E       | Cy2:Gal4, CollIV-GFP/ +<br>Cy2:Gal4, CollIV-GFP/UAS Dg RNAi                                                                                                                                                              | Cross at 25°C ,2days at 30°C                    |
|                  | F,H,I,J,M | Tj:Gal4, CollIV-GFP, <i>Dg</i> <sup>086</sup> / UAS: Dg-C, <i>Dg</i> <sup>043</sup>                                                                                                                                      | 25°C                                            |
|                  | G,H,K,L,M | Cy2:Gal4, CollIV-GFP, <i>Dg</i> <sup>086</sup> / UAS: Dg-C, <i>Dg</i> <sup>043</sup>                                                                                                                                     | 25°C                                            |
|                  | H,M       | CollIV-GFP, <i>Dg</i> <sup>086</sup> / <i>Dg</i> <sup>043</sup>                                                                                                                                                          | 25°C                                            |
|                  | N         | Cy2:Gal4/UAS-GFP                                                                                                                                                                                                         | 18°C                                            |
|                  | O         | WT                                                                                                                                                                                                                       |                                                 |
|                  | P         | Cy2:Gal4 /UAS-DG                                                                                                                                                                                                         | 25°C                                            |
| <b>Figure 7</b>  | A         | Tj:Gal4, CollIV-GFP<br>Tj:Gal4, CollIV-GFP /UAS <i>Dys</i> RNAi<br>Tj:Gal4, CollIV-GFP; UAS:Rab10-RFP<br>Tj:Gal4, CollIV-GFP /UAS <i>Dys</i> RNAi ; UAS:Rab10-RFP                                                        | 25°C                                            |
|                  | B-K       | Tj:Gal4; tub:Gal80 <sup>ts</sup><br>Tj:Gal4; tub:Gal80 <sup>ts</sup> /UAS <i>Dys</i> RNAi<br>Tj:Gal4; tub:Gal80 <sup>ts</sup> ; UAS:Rab10-RFP<br>Tj:Gal4; tub:Gal80 <sup>ts</sup> /UAS <i>Dys</i> RNAi ; UAS:Rab10-RFP   | 25°C with or w/o switch at 18°C during 72 hours |
| <b>Figure S5</b> | A,E,F,G   | Tj:Gal4, CollIV-GFP                                                                                                                                                                                                      | 30°C                                            |
|                  | B,E,F,G,H | Tj:Gal4, CollIV-GFP; UAS:Rab10-RFP                                                                                                                                                                                       |                                                 |
|                  | C,E,F,G   | Tj:Gal4, CollIV-GFP /UAS <i>Dys</i> RNAi                                                                                                                                                                                 |                                                 |
|                  | D,E,F,G   | Tj:Gal4, CollIV-GFP /UAS <i>Dys</i> RNAi ; UAS:Rab10-RFP                                                                                                                                                                 |                                                 |
|                  | I         | Tj:Gal4, CollIV-GFP /UAS <i>Dys</i> RNAi                                                                                                                                                                                 |                                                 |
|                  | J         | Tj:Gal4, CollIV-GFP /UAS <i>Dys</i> RNAi ; UAS:tomato                                                                                                                                                                    |                                                 |
|                  |           | Tj:Gal4; tub:Gal80 <sup>ts</sup><br>Tj:Gal4 ; tub:Gal80 <sup>ts</sup> ; UAS:Rab10-RFP<br>Tj:Gal4 ; tub:Gal80 <sup>ts</sup> /UAS <i>Dys</i> RNAi<br>Tj:Gal4; tub:Gal80 <sup>ts</sup> /UAS <i>Dys</i> RNAi ; UAS:Rab10-RFP | 25°C with or w/o switch at 18°C during 72 hours |

**Table S2 : RESOURCES and REAGENT TABLE**

| REAGENT or RESOURCE                                                     | SOURCE                               | IDENTIFIER                                 |
|-------------------------------------------------------------------------|--------------------------------------|--------------------------------------------|
| <b>Antibodies</b>                                                       |                                      |                                            |
| Anti-GFP, goat                                                          | Abcam                                | 5450                                       |
| Laminin, Guinea Pig                                                     | (Harpaz and Volk 2012) (Volk lab)    | N/A                                        |
| Beta integrin, mouse                                                    | Developmental Studies Hybridoma Bank | CF.6G11                                    |
| <b>Chemicals, Peptides, and Recombinant Proteins</b>                    |                                      |                                            |
| FM4-64                                                                  | Invitrogen                           | T13320                                     |
| Phalloidin Alexa568 or Alexa 488                                        | invitrogen                           | A12380 or A12379                           |
| <b>Experimental Models: Organisms/Strains</b>                           |                                      |                                            |
| <i>w</i> <sup>118</sup>                                                 | Bloomington Drosophila Stock Center  | FlyBase ID: FBal0018186<br>BDSC:3605       |
| <i>Dg</i> <sup>O86</sup>                                                | {Christoforou 2008} (Rob Ray)        | FlyBase ID: FBal0218114                    |
| <i>Dg</i> <sup>O43</sup>                                                | Christoforou 2008} (Rob Ray)         | FlyBase ID: FBal0218112                    |
| <i>Dys</i> <sup>E17</sup>                                               | Christoforou 2008} (Rob Ray)         | FlyBase ID: FBal0241311                    |
| <i>Dys</i> <sup>Exel6184</sup> : <i>FRT 82B</i> , <i>Df(3R)Exel6184</i> | Bloomington Drosophila Stock Center  | BDSC: 7663;<br>FlyBase ID: FBab0038239     |
| RNAi <i>Dg</i> : UAS: <i>Dg</i> (KK100828)                              | Vienna Drosophila Resource Center    | FBal0230939<br>VDRC: v107029               |
| RNAi <i>Dys</i> : UAS : <i>Dys</i> (KK101285)                           | Vienna Drosophila Resource Center    | FBal0231174<br>VDRC: v108006               |
| Pcan-GFP : <u>P{PTT-un1}trol</u> <sup>1973</sup>                        | Kyoto Stock Center (DGRC)            | FlyBase ID: FBal0191079 :<br>DGRC : 110836 |
| collIV-GFP : P{PTT-un1}CollIV <sup>G205</sup>                           | Kyoto Stock Center (DGRC)            | FlyBase ID: FBti0074199; DGRC: 110626      |
| LanA-GFP : LanA(fTRG00574.sfGFP-TVPTBF)                                 | Vienna Drosophila Resource Center    | VDRC: v318155<br>FlyBase ID: FBal0339089   |
| Pcan-mCherry                                                            | This paper                           | based on MI03800                           |
| UAS:Rab10-RFP                                                           | Isabella and Horne-Badovinac, 2016   |                                            |
| UAS: tomato                                                             | Bloomington Drosophila Stock Center  | BDSC: 30124                                |
| Tj:Gal4 : P{w+mW.hs=GawB}NP1624                                         | Kyoto Stock Center                   | DGRC: 104055<br>FlyBase ID: FBti0034540    |
| Cy2:Gal4 : w; P{GawB}CY2                                                | {Queenan 1997} (St Johnston lab)     | FlyBase ID: FBti0007266                    |

|                                                                                                                        |                                           |                                            |
|------------------------------------------------------------------------------------------------------------------------|-------------------------------------------|--------------------------------------------|
| Tub:Gal80ts : w[*]; sna[Sco]/CyO; P{w[+mC]=tubP-GAL80[ts]}7                                                            | Bloomington<br>Drosophila Stock<br>Center | BDSC: 67071;<br>FlyBase ID:<br>FBti0027798 |
| <i>Fat2</i> <sup>N103-2</sup>                                                                                          | {HorneBadovinac<br>2012}                  | FlyBase ID:<br>FBal0267777                 |
| <i>Fat2</i> <sup>58D</sup>                                                                                             | {Viktorinová 2009}<br>(Dhamann)           | FlyBase ID:<br>FBal0241216                 |
| UAS:Dg-C                                                                                                               | (Deng et al, 2003)<br>(Ruhola-Baker lab)  | FlyBase ID:<br>FBal0145088                 |
| FRTG13, Ubi:GFP <sup>nls</sup> : w[1118];<br>P{w[+mW.hs]=FRT(w[hs])}G13 P{w[+mC]=Ubi-<br>GFP.nls}2R1 P{Ubi-GFP.nls}2R2 | Bloomington<br>Drosophila Stock<br>Center | BDSC: 5826                                 |
| Fat2-DeltaICD-3xGFP                                                                                                    | (Barlan et al, 2017)                      | FlyBase ID:<br>FBal0326665                 |
| y,w, hs:flp : P{ry[+t7.2]=hsFLP}22, w[*]                                                                               | Bloomington<br>Drosophila Stock<br>Center | BDSC: 8862;<br>FlyBase ID:<br>FBst0008862  |
| Software and Algorithms                                                                                                |                                           |                                            |
| Fiji                                                                                                                   | (Schindelin et al, 2012)                  |                                            |
| R                                                                                                                      |                                           |                                            |
| Prism                                                                                                                  |                                           |                                            |

**Table S3: Results of the statistical analysis for Fig 7I-L**

| test genotype 1- genotype 2 | LOP<br>p value | COP<br>p value | TOP<br>p value | Delta LOP -TOP<br>p value |
|-----------------------------|----------------|----------------|----------------|---------------------------|
| <b>Stage 4:</b>             |                |                |                |                           |
| WT-Fat2ΔICD                 | <.0001         | 0.9990         | 0.0008         | <.0001                    |
| WT-Dys,Fat2ΔICD             | <.0001         | <.0001         | <.0001         | 0.0038                    |
| WT-Dys                      | <.0001         | <.0001         | <.0001         | 0.0023                    |
| Fat2ΔICD-Dys,Fat2ΔICD       | <.0001         | <.0001         | <.0001         | 0.3807                    |
| Fat2ΔICD-Dys                | <.0001         | <.0001         | 0.0055         | 0.0452                    |
| Dys,Fat2ΔICD-Dys            | 0.0613         | 0.8408         | 0.4865         | 0.9629                    |
| <b>Stage 5:</b>             |                |                |                |                           |
| WT-Fat2ΔICD                 | <.0001         | <.0001         | <.0001         | <.0001                    |
| WT-Dys,Fat2ΔICD             | <.0001         | <.0001         | <.0001         | 0.0059                    |
| WT-Dys                      | <.0001         | <.0001         | <.0001         | 0.0166                    |
| Fat2ΔICD-Dys,Fat2ΔICD       | <.0001         | <.0001         | 0.0250         | <.0001                    |
| Fat2ΔICD-Dys                | <.0001         | <.0001         | 0.9973         | <.0001                    |
| Dys,Fat2ΔICD-Dys            | <.0001         | 0.3865         | 0.0413         | 0.8432                    |
| <b>Stage 6:</b>             |                |                |                |                           |
| WT-Fat2ΔICD                 | <.0001         | <.0001         | 0.0004         | <.0001                    |
| WT-Dys,Fat2ΔICD             | <.0001         | <.0001         | <.0001         | 0.1535                    |
| WT-Dys                      | <.0001         | <.0001         | <.0001         | 0.7643                    |
| Fat2ΔICD-Dys,Fat2ΔICD       | <.0001         | <.0001         | 0.0209         | <.0001                    |
| Fat2ΔICD-Dys                | <.0001         | <.0001         | 0.8242         | <.0001                    |
| Dys,Fat2ΔICD-Dys            | <.0001         | 0.6676         | 0.1256         | 0.3830                    |
| <b>Stage 7:</b>             |                |                |                |                           |
| WT-Fat2ΔICD                 | <.0001         | 0.0549         | 0.5779         | 0.2422                    |
| WT-Dys,Fat2ΔICD             | <.0001         | <.0001         | 0.0079         | 0.9879                    |
| WT-Dys                      | <.0001         | <.0001         | 0.5052         | 0.9830                    |
| Fat2ΔICD-Dys,Fat2ΔICD       | <.0001         | <.0001         | 0.3924         | 0.0844                    |
| Fat2ΔICD-Dys                | 0.9693         | <.0001         | 1.0000         | 0.4280                    |
| Dys,Fat2ΔICD-Dys            | <.0001         | 0.5118         | 0.4610         | 0.8844                    |
| <b>Stage 8:</b>             |                |                |                |                           |
| WT-Fat2ΔICD                 | 0.4559         | 0.0574         | 0.9600         | 0.9742                    |
| WT-Dys,Fat2ΔICD             | 0.9388         | 0.5843         | 1.0000         | 0.9784                    |
| WT-Dys                      | 0.9164         | 0.9753         | 1.0000         | 0.9538                    |
| Fat2ΔICD-Dys,Fat2ΔICD       | 0.7539         | 0.4490         | 0.9685         | 0.8093                    |
| Fat2ΔICD-Dys                | 0.8422         | 0.0979         | 0.9620         | 0.7549                    |
| Dys,Fat2ΔICD-Dys            | 0.9995         | 0.7944         | 1.0000         | 0.9986                    |
